# Supplementary material for: Inflammatory Gene Regulatory Networks in Amnion Cells Following Cytokine Stimulation: Translational Systems Approach to Modeling Human Parturition
Source: PLoS One. 2011 Jun 2;6(6):e20560. doi: 10.1371/journal.pone.0020560 (PMC3107214; doi:10.1371/journal.pone.0020560)
Supplement: Table S1 — Target genes with microarray expression data. This spreadsheet contains replicate-combined intensities for the full list of 190 unique, differentially expressed genes (see Materials and Methods, Microarray Analysis and Data Processing) from the microarray data of the amnion mesenchymal cells (AMCs). Column 1 indicates the HUGO gene symbol of the gene. Column 2 indicates the NCBI Entrez Gene ID. Column 3 provides the description of the gene, as based on the Affymetrix Human Genome GeneChip annotation file. Columns 4 through 6 indicate the average log2 intensity observed across three replicate experiments of vehicle control samples (Column 4), and AMCs treated with IL-1β for 1 h (Column 5) or 8 h (Column 6). (XLS) [file pone.0020560.s004.xls]

## Sheet: Supplemental Table S1
HUGO Gene Symbol	EntrezGene ID	Description	Average vehicle	Average 1hr	Average 8hr
ADRB2	154	Adrenergic, beta-2-, receptor, surface	4.31825	5.86349	5.30914
AMPD3	272	Adenosine monophosphate deaminase (isoform E)	6.39875	7.15301	7.93744
APOBEC3G	60489	Apolipoprotein B mRNA editing enzyme, catalytic polypeptide-like 3G	5.0323	4.60784	5.57512
ATF3	467	Activating transcription factor 3	6.51079	9.40293	8.0014
ATP2B1	490	ATPase, Ca++ transporting, plasma membrane 1	7.87687	8.10034	8.85241
BCL2A1	597	BCL2-related protein A1	3.59256	5.00144	5.82062
BCL3	602	B-cell CLL/lymphoma 3	7.11872	8.3668	8.14957
BDKRB1	623	Bradykinin receptor B1	10.0256	11.4618	11.2998
BDKRB2	624	Bradykinin receptor B2	8.00297	8.90803	9.23248
BHLHE40 / BHLHB2	8553	Basic helix-loop-helix domain containing, class B, 2	8.21798	9.86236	8.57225
BHLHE41 / BHLHB3	79365	Basic helix-loop-helix domain containing, class B, 3	7.97378	9.21623	8.83793
BID	637	BH3 interacting domain death agonist	8.00676	8.19073	9.11002
BIRC3	330	Baculoviral IAP repeat-containing 3	3.97342	7.431	6.78753
BMP2	650	Bone morphogenetic protein 2	6.97934	8.17461	7.35298
BST2	684	Bone marrow stromal cell antigen 2	6.83915	6.61598	7.67445
BTG2	7832	BTG family, member 2	7.95457	9.10599	8.44319
BTN3A3	10384	Butyrophilin, subfamily 3, member A3	6.46483	6.42845	7.46522
C1QTNF1	114897	C1q and tumor necrosis factor related protein 1	7.19166	7.62428	8.39139
CCL2	6347	Chemokine (C-C motif) ligand 2	7.74832	11.5891	12.2612
CCL20	6364	Chemokine (C-C motif) ligand 20	6.3841	9.71654	9.57099
CCL5	6352	Chemokine (C-C motif) ligand 5	4.22434	5.03885	7.14651
CCL7	6354	Chemokine (C-C motif) ligand 7	5.28218	6.01599	7.41974
CCNL1	57018	Cyclin L1	8.57339	9.70719	9.04124
CCRN4L	25819	CCR4 carbon catabolite repression 4-like (S. cerevisiae)	5.6068	6.89082	5.89154
CD44	960	CD44 molecule (Indian blood group)	5.08634	7.56393	6.01564
CD83	9308	CD83 molecule	4.72836	7.09636	6.35209
CEBPD	1052	CCAAT/enhancer binding protein (C/EBP), delta	9.35831	10.8312	11.1026
CFB	629	Complement factor B	5.37548	6.38159	8.69513
CLDN1	9076	Claudin 1	5.32523	6.24359	6.92466
CSF1	1435	Colony stimulating factor 1 (macrophage)	7.32432	8.77284	8.9967
CSF2	1437	Colony stimulating factor 2 (granulocyte-macrophage)	4.33262	8.81791	7.48602
CSF3	1440	Colony stimulating factor 3 (granulocyte)	6.01288	7.03547	8.46962
CTGF	1490	Connective tissue growth factor	11.6134	11.978	11.0052
CXCL1	2919	Chemokine (C-X-C motif) ligand 1 (melanoma growth stimulating activity, alpha)	8.48175	12.0026	12.2169
CXCL2	2920	Chemokine (C-X-C motif) ligand 2	5.40921	12.6201	12.0727
CXCL3	2921	Chemokine (C-X-C motif) ligand 3	4.90925	11.9873	11.4329
CXCL5	6374	Chemokine (C-X-C motif) ligand 5	6.15662	7.51329	9.57129
CXCL6	6372	Chemokine (C-X-C motif) ligand 6 (granulocyte chemotactic protein 2)	8.65576	9.79437	11.491
CXCR7	57007	Chemokine (C-X-C motif) receptor 7	5.88439	7.00728	6.91361
CYR61	3491	Cysteine-rich, angiogenic inducer, 61	10.1076	11.2291	10.5547
DDIT4	54541	DNA-damage-inducible transcript 4	8.14392	9.58027	9.4346
DIO2	1734	Deiodinase, iodothyronine, type II	5.40855	5.46734	6.50004
DRAM1 / DRAM	55332	Damage-regulated autophagy modulator	9.59383	10.221	10.8538
DUSP1	1843	Dual specificity phosphatase 1	7.96479	10.3016	8.88594
DUSP2	1844	Dual specificity phosphatase 2	6.26913	7.78773	6.10628
DUSP5	1847	Dual specificity phosphatase 5	6.58453	8.76229	7.58031
DUSP6	1848	Dual specificity phosphatase 6	7.99494	9.07228	8.2687
EFNA1	1942	Ephrin-A1	4.88966	6.64846	5.54185
EGR1	1958	Early growth response 1	6.55668	9.67226	6.93366
EGR2	1959	Early growth response 2 (Krox-20 homolog, Drosophila)	4.7809	7.22493	5.74971
EGR3	1960	Early growth response 3	4.43917	6.65187	4.66859
ELF3	1999	E74-like factor 3 (ets domain transcription factor, epithelial-specific )	5.19634	5.63648	6.20645
EPHA2	1969	EPH receptor A2	7.85403	8.84067	8.16078
ETS1	2113	V-ets erythroblastosis virus E26 oncogene homolog 1 (avian)	6.03669	7.08595	6.90844
ETV1	2115	Ets variant gene 1	6.68533	6.64317	5.6835
F3	2152	Coagulation factor III (thromboplastin, tissue factor)	8.30596	9.35596	8.1263
FAM110B	90362	Family with sequence similarity 110, member B	6.09033	6.33603	7.30769
FGF2	2247	Fibroblast growth factor 2 (basic)	7.79969	8.20331	8.87475
FGF5	2250	Fibroblast growth factor 5	6.50469	7.34214	6.2352
FOS	2353	V-fos FBJ murine osteosarcoma viral oncogene homolog	5.3117	6.88948	5.66295
FOSB	2354	FBJ murine osteosarcoma viral oncogene homolog B	6.00417	7.77042	5.73342
FOSL1	8061	FOS-like antigen 1	7.3075	9.21748	8.25643
GADD45B	4616	Growth arrest and DNA-damage-inducible, beta	7.50257	8.51468	7.46976
GAS1	2619	Growth arrest-specific 1	8.60302	8.15474	9.66313
GBP1	2633	Guanylate binding protein 1, interferon-inducible, 67kDa	8.24233	8.72289	9.28646
GBP2	2634	Guanylate binding protein 2, interferon-inducible	6.42493	7.28664	8.29103
GCH1	2643	GTP cyclohydrolase 1 (dopa-responsive dystonia)	5.83894	7.20313	7.86438
GEM	2669	GTP binding protein overexpressed in skeletal muscle	8.09072	10.0301	9.26357
GFPT2	9945	Glutamine-fructose-6-phosphate transaminase 2	9.32627	9.52323	10.6338
HBEGF	1839	Heparin-binding EGF-like growth factor	7.65534	9.09179	8.23194
HERC5	51191	Hect domain and RLD 5	4.76778	4.56944	5.73481
HES1	3280	Hairy and enhancer of split 1, (Drosophila)	6.19254	6.78311	5.55788
ICAM1	3383	Intercellular adhesion molecule 1 (CD54), human rhinovirus receptor	6.75639	9.57147	9.8854
ICAM4	3386	Intercellular adhesion molecule 4 (Landsteiner-Wiener blood group)	4.33265	5.73228	5.69254
ID1	3397	Inhibitor of DNA binding 1, dominant negative helix-loop-helix protein	8.7907	7.76119	7.69421
IER2	9592	Immediate early response 2	10.0713	12.1305	10.5725
IER3	8870	Immediate early response 3	10.8477	13.3654	12.8127
IFI35	3430	Interferon-induced protein 35	7.4516	7.31951	8.54586
IFI44	10561	Interferon-induced protein 44	5.74533	5.83618	7.49841
IFI6	2537	Interferon, alpha-inducible protein 6	8.62566	8.14512	9.19259
IFIH1	64135	Interferon induced with helicase C domain 1	4.57769	5.08536	7.13491
IFIT3	3437	Interferon-induced protein with tetratricopeptide repeats 3	7.69299	7.44153	8.82936
IL15RA	3601	Interleukin 15 receptor, alpha	5.97112	5.76452	6.77033
IL1A	3552	Interleukin 1, alpha	5.49151	10.0321	9.66867
IL1B	3553	Interleukin 1, beta	8.5327	11.4903	12.0273
IL32	9235	Interleukin 32	6.33208	6.91688	7.77879
IL6	3569	Interleukin 6 (interferon, beta 2)	7.28246	11.3347	11.5733
IL7R	3575	Interleukin 7 receptor	7.35396	7.49494	8.66396
IL8	3576	Interleukin 8	8.72718	12.4119	12.5408
INHBA	3624	Inhibin, beta A	10.6687	11.9474	11.8584
IRF1	3659	Interferon regulatory factor 1	6.65349	10.4177	8.80992
ISG15	9636	ISG15 ubiquitin-like modifier	9.57392	9.45521	10.4746
ISG20	3669	Interferon stimulated exonuclease gene 20kDa	5.05646	5.14025	6.38006
KDM6B / JMJD3	23135	Jumonji domain containing 3, histone lysine demethylase	6.81163	8.27823	7.25327
JUN	3725	Jun oncogene	7.58419	9.34755	8.37408
JUNB	3726	Jun B proto-oncogene	7.14174	9.46945	8.13305
KIAA0247	9766	KIAA0247	7.99309	8.62624	9.09176
KLF6	1316	Kruppel-like factor 6	8.58817	10.8669	9.20521
KLF9	687	Kruppel-like factor 9	5.06384	6.18008	5.66565
KYNU	8942	Kynureninase (L-kynurenine hydrolase)	4.16547	4.02137	5.94131
LIF	3976	Leukemia inhibitory factor (cholinergic differentiation factor)	7.49518	10.8135	9.58947
LRIG1	26018	Leucine-rich repeats and immunoglobulin-like domains 1	8.51354	8.80776	9.61408
LRRN3	54674	Leucine rich repeat neuronal 3	5.6191	5.61724	6.93041
MAFF	23764	V-maf musculoaponeurotic fibrosarcoma oncogene homolog F (avian)	7.75672	9.5949	8.78458
MAP3K8	1326	Mitogen-activated protein kinase kinase kinase 8	4.68825	7.77975	7.46681
SOD2 / MGC5618	6648	mitochondrial superoxide dismutase 2, was hypothetical protein MGC5618	8.64417	10.717	11.4263
MIR614	N/A	microRNA 614	9.46788	9.63041	8.66077
MMP10	4319	Matrix metallopeptidase 10 (stromelysin 2)	6.21362	6.34808	7.32735
MMP12	4321	Matrix metallopeptidase 12 (macrophage elastase)	6.87251	6.98633	7.88349
MSC	9242	Musculin (activated B-cell factor-1)	6.5262	8.26437	7.89668
MX1	4599	Myxovirus (influenza virus) resistance 1, interferon-inducible protein p78 (mouse)	5.76274	5.92106	8.53574
MX2	4600	Myxovirus (influenza virus) resistance 2 (mouse)	5.51097	5.49977	7.53798
NAB1	4664	NGFI-A binding protein 1 (EGR1 binding protein 1)	7.46227	7.76985	8.48352
NAMPT	10135	Nicotinamide phosphoribosyltransferase	7.79847	8.46971	8.88574
NEDD9	4739	Neural precursor cell expressed, developmentally down-regulated 9	6.53093	7.8465	6.93264
NFKB1	4790	Nuclear factor of kappa light polypeptide gene enhancer in B-cells 1 (p105)	8.12777	9.18971	9.35781
NFKB2	4791	Nuclear factor of kappa light polypeptide gene enhancer in B-cells 2 (p49/p100)	6.16451	6.85751	7.35592
NFKBIA	4792	Nuclear factor of kappa light polypeptide gene enhancer in B-cells inhibitor, alpha	9.0258	13.3944	12.3565
NFKBIE	4794	Nuclear factor of kappa light polypeptide gene enhancer in B-cells inhibitor, epsilon	6.48092	7.96658	7.48378
NINJ1	4814	Ninjurin 1	8.43266	9.311	9.57442
NKX3-1	4824	NK3 homeobox 1	6.72857	9.81522	9.3742
NR4A2	4929	Nuclear receptor subfamily 4, group A, member 2	4.32294	5.82925	4.95286
NRP2	8828	Neuropilin 2	7.90189	8.16744	9.06283
NUAK2	81788	NUAK family, SNF1-like kinase, 2	5.89567	10.2022	8.52113
OLR1	4973	Oxidized low density lipoprotein (lectin-like) receptor 1	6.52562	7.85142	8.85301
PDE4B	5142	Phosphodiesterase 4B, cAMP-specific (phosphodiesterase E4 dunce homolog, Drosophila)	6.93076	8.0883	7.73503
PDLIM4	8572	PDZ and LIM domain 4	7.30509	7.44962	8.36624
PDPN	10630	Podoplanin	6.42122	6.78851	7.83427
PHLDA1	22822	Pleckstrin homology-like domain, family A, member 1	8.1374	9.17426	8.72664
PIM1	5292	Pim-1 oncogene	7.11758	8.79055	7.96351
PIM2	11040	Pim-2 oncogene	6.47839	6.58697	7.49639
PLAU	5328	Plasminogen activator, urokinase	8.88962	10.4967	9.72983
PLD1	5337	Phospholipase D1, phosphatidylcholine-specific	6.14838	6.08709	7.17713
PLK3	1263	Polo-like kinase 3 (Drosophila)	7.17044	8.20288	7.46054
PMAIP1	5366	Phorbol-12-myristate-13-acetate-induced protein 1	6.30302	7.90987	7.14192
POMZP3	22932	POM (POM121 homolog, rat) and ZP3 fusion	5.66166	6.12274	6.67111
PPP1R15A	23645	Protein phosphatase 1, regulatory (inhibitor) subunit 15A	8.00489	9.75754	8.44974
PTGER4	5734	Prostaglandin E receptor 4 (subtype EP4)	6.04317	8.80077	8.55102
PTGES	9536	Prostaglandin E synthase	6.66014	7.14202	8.6008
PTGS2	5743	Prostaglandin-endoperoxide synthase 2 (prostaglandin G/H synthase and cyclooxygenase)	6.5737	10.2903	10.0748
PTX3	5806	Pentraxin-related gene, rapidly induced by IL-1 beta	8.9547	10.4734	10.2487
RARRES1	5918	Retinoic acid receptor responder (tazarotene induced) 1	6.14369	6.86306	8.01756
RCAN1	1827	Regulator of calcineurin 1	8.76352	9.9061	9.98771
REL	5966	V-rel reticuloendotheliosis viral oncogene homolog (avian)	4.4524	6.04913	5.56133
RELB	5971	V-rel reticuloendotheliosis viral oncogene homolog B, nuclear factor of kappa light polypeptide gene enhancer in B-cells 3 (avian)	6.05135	7.52792	7.63194
RGS2	5997	Regulator of G-protein signaling 2, 24kDa	10.3712	9.15272	9.73241
RGS4	5999	Regulator of G-protein signaling 4	10.7925	10.9378	9.89293
RIPK2	8767	Receptor-interacting serine-threonine kinase 2	9.1853	10.0901	10.3008
RNF19B	127544	Ring finger protein 19B	6.0678	7.16926	6.95086
RRAD	6236	Ras-related associated with diabetes	6.34337	7.58164	7.08587
RTP4	64108	Receptor (chemosensory) transporter protein 4	4.5611	4.42114	5.75501
SAMD4A	23034	Sterile alpha motif domain containing 4A	3.98092	5.99954	4.31912
SAT1	6303	Spermidine/spermine N1-acetyltransferase 1	10.4251	10.7096	11.6288
SDC4	6385	Syndecan 4	10.2794	11.3059	11.4139
SERPINA3	12	Serpin peptidase inhibitor, clade A (alpha-1 antiproteinase, antitrypsin), member 3	6.54367	7.45897	8.14762
SLC12A7	10723	Solute carrier family 12 (potassium/chloride transporters), member 7	7.49422	7.98043	8.50204
SLC25A37	51312	Solute carrier family 25, member 37	6.08234	7.27143	7.30399
SLC2A6	11182	Solute carrier family 2 (facilitated glucose transporter), member 6	7.70856	8.27919	9.09524
SLC39A14	23516	Solute carrier family 39 (zinc transporter), member 14	9.92705	10.343	11.3344
SLC43A3	29015	Solute carrier family 43, member 3	6.59466	6.81548	7.69728
SOCS2	8835	Suppressor of cytokine signaling 2	6.75675	7.14349	5.90894
SOCS3	9021	Suppressor of cytokine signaling 3	5.71761	7.07222	6.3132
SOD2	6648	Superoxide dismutase 2, mitochondrial	8.02379	9.60094	10.7393
SPRY2	10253	Sprouty homolog 2 (Drosophila)	6.89216	8.4085	7.30015
SPRY4	81848	Sprouty homolog 4 (Drosophila)	7.4039	9.17348	7.81697
TDO2	6999	Tryptophan 2,3-dioxygenase	5.54624	5.75351	6.83173
TMEM140	55281	Transmembrane protein 140	5.63835	5.44268	6.57448
TNC	3371	Tenascin C (hexabrachion)	4.12271	6.65655	5.15941
TNF	7124	Tumor necrosis factor (TNF superfamily, member 2)	4.18144	7.69082	5.51884
TNFAIP2	7127	Tumor necrosis factor, alpha-induced protein 2	5.55611	8.07841	8.37598
TNFAIP3	7128	Tumor necrosis factor, alpha-induced protein 3	7.16465	12.1997	11.4116
TNFAIP6	7130	Tumor necrosis factor, alpha-induced protein 6	7.56562	8.63738	9.7616
TNFAIP8	25816	Tumor necrosis factor, alpha-induced protein 8	7.8509	9.35416	9.31832
TNFRSF11B	4982	Tumor necrosis factor receptor superfamily, member 11b (osteoprotegerin)	5.75567	6.4427	6.96918
TNFRSF9	3604	Tumor necrosis factor receptor superfamily, member 9	5.15379	6.24678	7.33775
TNFSF18	8995	Tumor necrosis factor (ligand) superfamily, member 18	5.73134	6.29927	7.06775
TNIP1	10318	TNFAIP3 interacting protein 1	8.07176	8.54134	9.5928
TRAF1	7185	TNF receptor-associated factor 1	4.83964	7.12043	6.72141
TRIB1	10221	Tribbles homolog 1 (Drosophila)	8.39787	9.66564	8.82647
TWIST1	7291	Twist homolog 1 (acrocephalosyndactyly 3; Saethre-Chotzen syndrome) (Drosophila)	8.135	9.14957	8.59795
TXNIP	10628	Thioredoxin interacting protein	9.83282	8.81183	9.42569
UBD	10537	Ubiquitin D	3.88698	3.91738	5.65472
UBE2L6	9246	Ubiquitin-conjugating enzyme E2L 6	8.37193	8.19819	9.20869
USP18	11274	Ubiquitin specific peptidase 18	5.68599	5.61696	6.91437
VCAM1	7412	Vascular cell adhesion molecule 1	3.93871	9.1001	10.5459
WTAP	9589	Wilms tumor 1 associated protein	8.94717	9.77936	10.5019
ZC3H12A	80149	Zinc finger CCCH-type containing 12A	6.56834	10.013	9.51595
ZFP36	7538	Zinc finger protein 36, C3H type, homolog (mouse)	7.4634	10.5231	8.26564
ZFP36L1	677	Zinc finger protein 36, C3H type-like 1	8.59747	9.57162	9.30072
ZNF267	10308	Zinc finger protein 267	5.31442	6.48056	6.36667
