# Supplementary material for: Inflammatory Gene Regulatory Networks in Amnion Cells Following Cytokine Stimulation: Translational Systems Approach to Modeling Human Parturition
Source: PLoS One. 2011 Jun 2;6(6):e20560. doi: 10.1371/journal.pone.0020560 (PMC3107214; doi:10.1371/journal.pone.0020560)
Supplement: Table S3 — Transcription factor binding motif enrichment analysis for the AMC dataset of genes upregulated at 1 h or 8 h, as analyzed using Pscan. Column 1 contains the names of JASPAR transcription factor matrices and column 2 contains the JASPAR matrix identification numbers. Column 3 contains the z-scores for each matrix as calculated with the z-test. The matrices are ranked by their p-value (column 4) that reflects the probability of having the same result by chance. Only matrices with p-values of less than 0.05 were considered to be potentially significant. Columns 5 through 8 contains the sample statistics for the input reference sequence mRNA accession numbers for the 169 genes (see Materials and Methods, Transcription Factor Binding Motif Enrichment Analysis) including average score in the input set (column 5) compared to the background mean (column 6) and standard deviation (column 7), along with input sample size (column 8). (XLS) [file pone.0020560.s006.xls]

## Sheet: All upregulated at 1 or 8hr
TF_NAME	MATRIX_ID	Z_SCORE	P_VALUE	SAMPLE_AVERAGE	BACKGROUND_AVERAGE	SAMPLE_DEVSTD	SAMPLE_SIZE
NF-kappaB	MA0061.1	8.55133	4.16355e-18	0.899032	0.86835	0.0565275	169
RELA	MA0107.1	8.27426	4.20233e-17	0.884726	0.85444	0.0634137	169
REL	MA0101.1	7.01166	8.9706e-13	0.915232	0.894305	0.0484124	169
NFKB1	MA0105.1	6.82125	3.67006e-12	0.863087	0.836145	0.0573933	169
TBP	MA0108.2	4.12789	1.71618e-05	0.867783	0.853446	0.0458813	169
SP1	MA0079.2	3.8996	4.58122e-05	0.950889	0.936659	0.0449413	169
STAT1	MA0137.2	2.98018	0.00138685	0.826623	0.816133	0.0483907	169
INSM1	MA0155.1	2.91215	0.00175028	0.883268	0.874779	0.0333205	169
MZF1_5-13	MA0057.1	2.8921	0.0018536	0.935849	0.928659	0.0321755	169
Pax6	MA0069.1	2.44406	0.00708159	0.799107	0.792377	0.0369264	169
SRF	MA0083.1	2.38404	0.00826513	0.779151	0.77102	0.0554105	169
Pax2	MA0067.1	2.25455	0.0118357	0.952595	0.947082	0.0318631	169
Tal1::Gata1	MA0140.1	2.11145	0.0170862	0.818965	0.81223	0.039263	169
PLAG1	MA0163.1	2.04751	0.019941	0.828992	0.821829	0.0465558	169
SOX9	MA0077.1	1.98855	0.0229607	0.882212	0.875285	0.0473835	169
CTCF	MA0139.1	1.93483	0.0260487	0.801623	0.795541	0.0431658	169
Pax4	MA0068.1	1.92941	0.0264113	0.788537	0.784192	0.0298296	169
SPIB	MA0081.1	1.83614	0.0327727	0.969984	0.965082	0.0318773	169
SOX10	MA0442.1	1.83251	0.0330241	0.976642	0.972044	0.0305513	169
TFAP2A	MA0003.1	1.77628	0.0373434	0.964184	0.959058	0.0373094	169
CEBPA	MA0102.2	1.66653	0.047284	0.90567	0.900547	0.0380444	169
